# Supplementary material for: Association of Area-Level Socioeconomic Deprivation With Hypoglycemic and Hyperglycemic Crises in US Adults With Diabetes
Source: PubMed Central journal article supplement (PMC8767428; doi:10.1001/jamanetworkopen.2021.43597), 2022-01-18
Supplement: jamanetwopen-e2143597-s001.pdf [file jamanetwopen-e2143597-s001.pdf]

## Supplementary Online Content

Kurani SS, Heien HC, Sangaralingham LR, et al. Association of area-level socioeconomic deprivation with hypoglycemic and hyperglycemic crises in US adults with diabetes. *JAMA Netw Open*. 2022;5(1):e2143597.  
doi:10.1001/jamanetworkopen.2021.43597

**eTable 1.** American Community Survey Census Indicators

**eTable 2.** Codes Used to Ascertain Hypoglycemia and DKA/HHS-Related Hospitalizations and Emergency Department Visits

**eTable 3.** Classification of Glucose-Lowering Medications

**eTable 4.** Risk Factors of Severe Hypoglycemia and DKA/HHS (Sensitivity Analysis Using the Partially Adjusted Model)

**eTable 5.** Estimated Rates of Severe Hypoglycemia and DKA/HHS (Sensitivity Analysis Using the Partially Adjusted Model)

**eTable 6.** Estimated Rates of Severe Hypoglycemia and DKA/HHS in Subgroups of Patient Age

**eTable 7.** Estimated Rates of Severe Hypoglycemia and DKA/HHS in Subgroups of Patient Sex

**eTable 8.** Estimated Rates of Severe Hypoglycemia and DKA/HHS in Subgroups of Glucose-Lowering Therapy

**eTable 9.** Estimated Rates of Severe Hypoglycemia and DKA/HHS in Subgroups of Patient Health Plans

**eReference**

This supplementary material has been provided by the authors to give readers additional information about their work.

**eTable 1.** American Community Survey Census Indicators

Shown are the survey census indicators, table references, and factor score coefficients from 2012-2017 that were used for area deprivation index (ADI) derivation.

| U.S. Census Indicator                                           | 2012-2017 ACS<br>Table Reference,<br>5-yr estimates | Factor Score Coefficients |          |
|-----------------------------------------------------------------|-----------------------------------------------------|---------------------------|----------|
|                                                                 |                                                     | 2016                      | 2017     |
| Median family income                                            | B19013                                              | -0.16087                  | -0.16993 |
| Income disparity                                                | B19001                                              | 0.08019                   | 0.06799  |
| Families below poverty level                                    | B17010                                              | 0.12555                   | 0.12298  |
| Percent population below 150% poverty threshold                 | C17002                                              | 0.22914                   | 0.23659  |
| Single parent household with dependents <18 years old           | B23008                                              | 0.03817                   | 0.04165  |
| Households without a motor vehicle                              | B25044                                              | 0.05666                   | 0.05646  |
| Households without a telephone                                  | B25043                                              | 0.00685                   | 0.00892  |
| Occupied housing units without complete plumbing                | B25016                                              | 0.02692                   | 0.02963  |
| Owner occupied housing units                                    | B25003                                              | -0.00888                  | -0.00733 |
| Households with >1 person per room                              | B25014                                              | 0.03546                   | 0.03747  |
| Median monthly mortgage                                         | B25088                                              | -0.13578                  | -0.13004 |
| Median gross rent                                               | B25064                                              | -0.05922                  | -0.06295 |
| Median home value                                               | B25077                                              | -0.07345                  | -0.0749  |
| Employed persons ≥16 years old in white collar occupation       | C24010                                              | -0.02079                  | -0.01947 |
| Civilian labor force unemployed (aged ≥16)                      | B23025                                              | 0.0228                    | 0.02451  |
| Population aged ≥25 years with <9-year education                | B15003                                              | 0.00431                   | 0.01132  |
| Population aged ≥25 years with at least a high school education | B15003                                              | -0.22112                  | -0.21015 |

**eTable 2.** Codes Used to Ascertain Hypoglycemia and DKA/HHS-Related Hospitalizations and Emergency Department Visits

| Health condition    | ICD-9 codes                                                                                                                                                   | ICD-10 codes                                                                                                                                                                                                                                           |
|---------------------|---------------------------------------------------------------------------------------------------------------------------------------------------------------|--------------------------------------------------------------------------------------------------------------------------------------------------------------------------------------------------------------------------------------------------------|
| <b>Hypoglycemia</b> | 251.0, 251.1, 251.2, 270.3, 962.3 or 250.8x (and not 259.8, 272.7, 681.xx, 682.xx, 686.9x, 707.1-707.9, 709.3, 730.0-730.2, 731.8) <i>per Ginde, et al(1)</i> | E08.641, E08.649, E09.641, E09.649, E10.641, E10.649, E11.641, E11.649, E13.641, E13.649, E15, E160, E161, E162, T383X1A, T383X1D, T383X1S, T383X2A, T383X2D, T383X2S, T383X3A, T383X3D, T383X3S, T383X4A, T383X4D, T383X4S, T383X5A, T383X5D, T383X5S |
| <b>DKA/HHS</b>      | 250.1x, 250.2x                                                                                                                                                | E10.10, E10.11, E11.00, E11.01, E11.641, E13.10                                                                                                                                                                                                        |

Abbreviations: DKA, diabetic ketoacidosis; HHS, hyperglycemic hyperosmolar state.

**eTable 3.** Classification of Glucose-Lowering Medications

Combination medications were considered as separate agents belonging to each ingredient class.

| Medication class                                  | Included agents                                                                                         |
|---------------------------------------------------|---------------------------------------------------------------------------------------------------------|
| <b>Biguanides</b>                                 | Metformin                                                                                               |
| <b>Sulfonylureas</b>                              | Glimepiride<br>Glipizide<br>Glyburide                                                                   |
| <b>Thiazolidinediones</b>                         | Pioglitazone<br>Rosiglitazone                                                                           |
| <b>DPP-4 inhibitors</b>                           | Alogliptin<br>Linagliptin<br>Sitagliptin<br>Saxagliptin                                                 |
| <b>GLP-1 receptor analogs</b>                     | Exenatide<br>Liraglutide<br>Albiglutide<br>Dulaglutide<br>Semaglutide<br>Lixisenatide                   |
| <b>SGLT2 inhibitors</b>                           | Canagliflozin<br>Empagliflozin<br>Dapagliflozin<br>Ertugliflozin                                        |
| <b>Glinides</b>                                   | Nateglinide<br>Repaglinide                                                                              |
| <b>Amylin analogs</b>                             | Pramlintide                                                                                             |
| <b><math>\alpha</math>-Glucosidase inhibitors</b> | Acarbose<br>Miglitol                                                                                    |
| <b>Basal insulin</b>                              | <u>Human</u><br>NPH<br>Isophane<br><br><u>Analog</u><br>Detemir<br>Glargine<br>Degludec                 |
| <b>Bolus insulin</b>                              | <u>Human</u><br>Regular<br><br><u>Analog</u><br>Aspart<br>Lispro<br>Glulisine<br>Inhaled powder insulin |

**eTable 4.** Risk Factors of Severe Hypoglycemia and DKA/HHS (Sensitivity Analysis Using the Partially Adjusted Model)

Results of negative binomial regression analyses adjusted only for patient demographics (age, sex, health plan) and percent White residents in the county.

|                                          | <b>Hypoglycemia</b> |                | <b>DKA/HHS</b>      |                |
|------------------------------------------|---------------------|----------------|---------------------|----------------|
|                                          | <b>IRR (95% CI)</b> | <b>p-value</b> | <b>IRR (95% CI)</b> | <b>p-value</b> |
| <b>Percent White residents in county</b> | 0.64 (0.51-0.82)    | <0.001         | 0.78 (0.62-0.99)    | 0.04           |
| <b>ADI quintile</b>                      |                     |                |                     |                |
| Q1 (least deprived)                      | Ref                 |                | Ref                 |                |
| Q2                                       | 1.00 (0.91-1.09)    | 0.96           | 1.02 (0.92-1.12)    | 0.75           |
| Q3                                       | 1.17 (1.06-1.28)    | 0.002          | 1.24 (1.11-1.37)    | <0.001         |
| Q4                                       | 1.15 (1.03-1.29)    | 0.02           | 1.12 (0.99-1.26)    | 0.07           |
| Q5 (most deprived)                       | 1.48 (1.33-1.64)    | <0.001         | 1.11 (0.99-1.26)    | 0.08           |
| <b>Sex</b>                               |                     |                |                     |                |
| Female                                   | Ref                 |                | Ref                 |                |
| Male                                     | 0.93 (0.90-0.96)    | <0.001         | 0.84 (0.79-0.88)    | <0.001         |
| <b>Health Plan</b>                       |                     |                |                     |                |
| Commercial                               | Ref                 |                | Ref                 |                |
| Medicare Advantage                       | 4.82 (4.45-5.21)    | <0.001         | 3.34 (3.05-3.65)    | <0.001         |
| <b>Age, years</b>                        |                     |                |                     |                |
| 18-44                                    | Ref                 |                | Ref                 |                |
| 45-64                                    | 0.58 (0.53-0.64)    | <0.001         | 0.17 (0.15-0.18)    | <0.001         |
| 65-74                                    | 0.35 (0.32-0.39)    | <0.001         | 0.04 (0.04-0.05)    | <0.001         |
| ≥75                                      | 0.49 (0.44-0.54)    | <0.001         | 0.04 (0.03-0.04)    | <0.001         |

Abbreviations: ADI, area deprivation index; DKA, diabetic ketoacidosis; HHS, hyperglycemic hyperosmolar state.

**eTable 5.** Estimated Rates of Severe Hypoglycemia and DKA/HHS (Sensitivity Analysis Using the Partially Adjusted Model)

Rates of severe hypoglycemia and DKA/HHS per 1000 person-years, analyses adjusted only for patient demographics (age, sex, health plan) and percent White residents in the county.

|                     | <b>Hypoglycemia</b><br>Rate per 1000 PY (95% CI) | <b>DKA/HHS</b><br>Rate per 1000 PY (95% CI) |
|---------------------|--------------------------------------------------|---------------------------------------------|
| <b>ADI quintile</b> |                                                  |                                             |
| Q1 (least deprived) | 11.16 (10.60-11.73)                              | 5.73 (5.38-6.09)                            |
| Q2                  | 11.14 (10.22-12.05)                              | 5.83 (5.34-6.32)                            |
| Q3                  | 13.01 (11.91-14.10)                              | 7.08 (6.45-7.71)                            |
| Q4                  | 12.86 (11.53-14.19)                              | 6.40 (5.73-7.07)                            |
| Q5 (most deprived)  | 16.49 (15.09-17.89)                              | 6.39 (5.72-7.05)                            |

Abbreviations: ADI, area deprivation index; DKA, diabetic ketoacidosis; HHS, hyperglycemic hyperosmolar state; PY, person-years.

**eTable 6.** Estimated Rates of Severe Hypoglycemia and DKA/HHS in Subgroups of Patient Age

Rates of severe hypoglycemia and DKA/HHS per 1000 person-years, analyses adjusted for patient demographics (age, sex, health plan), percent White residents in the county, comorbidities, and medications (fully adjusted model). \*p <0.05 for the IRR of the quintile examined (Q2-Q5) with ADI Q1 (least deprived) serving as the reference group.

|                        | <b>Hypoglycemia</b> |                                  | <b>DKA/HHS</b>      |                                  |
|------------------------|---------------------|----------------------------------|---------------------|----------------------------------|
|                        | <b>IRR (95% CI)</b> | <b>Rate per 1000 PY (95% CI)</b> | <b>IRR (95% CI)</b> | <b>Rate per 1000 PY (95% CI)</b> |
| <b>18-44 years old</b> |                     |                                  |                     |                                  |
| Q1 (least deprived)    | Ref                 | 11.42 (9.45-13.39)               | Ref                 | 28.93 (25.28-32.57)              |
| Q2                     | 1.16 (0.97-1.38)    | 13.21 (10.75-15.66)              | 1.09 (0.92-1.29)    | 31.51 (26.80-36.21)              |
| Q3                     | 0.90 (0.73-1.10)    | 10.26 (8.16-12.37)               | 1.17 (0.99-1.39)    | 33.87 (28.98-38.75)              |
| Q4                     | 1.27 (1.03-1.57)*   | 14.54 (11.64-17.44)              | 1.31 (1.07-1.60)*   | 37.80 (30.97-44.64)              |
| Q5 (most deprived)     | 1.24 (0.94-1.65)    | 14.22 (10.59-17.85)              | 1.42 (1.11-1.82)*   | 40.99 (31.26-50.72)              |
| <b>45-64 years old</b> |                     |                                  |                     |                                  |
| Q1 (least deprived)    | Ref                 | 11.61 (10.66-12.56)              | Ref                 | 7.75 (6.88-8.61)                 |
| Q2                     | 0.96 (0.87-1.07)    | 11.17 (10.08-12.27)              | 1.04 (0.93-1.17)    | 8.08 (7.20-8.97)                 |
| Q3                     | 1.05 (0.94-1.17)    | 12.16 (10.87-13.45)              | 1.15 (1.01-1.30)*   | 8.88 (7.76-9.99)                 |
| Q4                     | 1.03 (0.91-1.17)    | 11.99 (10.54-13.44)              | 1.06 (0.92-1.21)    | 8.18 (7.14-9.21)                 |
| Q5 (most deprived)     | 1.29 (1.14-1.46)*   | 15.00 (13.24-16.76)              | 1.00 (0.84-1.19)    | 7.76 (6.47-9.05)                 |
| <b>65-74 years old</b> |                     |                                  |                     |                                  |
| Q1 (least deprived)    | Ref                 | 13.42 (12.55-14.30)              | Ref                 | 4.11 (3.49-4.74)                 |
| Q2                     | 0.97 (0.88-1.07)    | 13.03 (11.85-14.21)              | 0.94 (0.81-1.10)    | 3.88 (3.33-4.43)                 |
| Q3                     | 1.14 (1.02-1.27)*   | 15.33 (13.90-16.75)              | 1.12 (0.95-1.33)    | 4.62 (3.91-5.32)                 |
| Q4                     | 1.20 (1.05-1.37)*   | 16.05 (14.04-18.05)              | 1.14 (0.95-1.35)    | 4.67 (3.90-5.44)                 |
| Q5 (most deprived)     | 1.37 (1.22-1.54)*   | 18.44 (16.64-20.23)              | 1.10 (0.92-1.33)    | 4.53 (3.79-5.28)                 |
| <b>≥75 years old</b>   |                     |                                  |                     |                                  |
| Q1 (least deprived)    | Ref                 | 17.79 (16.71-18.87)              | Ref                 | 3.18 (2.83-3.53)                 |
| Q2                     | 1.06 (0.96-1.16)    | 18.77 (17.19-20.35)              | 0.99 (0.86-1.15)    | 3.15 (2.73-3.58)                 |
| Q3                     | 1.18 (1.07-1.31)*   | 21.05 (19.23-22.88)              | 1.09 (0.95-1.26)    | 3.47 (3.03-3.91)                 |
| Q4                     | 1.17 (1.03-1.32)*   | 20.75 (18.47-23.03)              | 1.09 (0.91-1.31)    | 3.47 (2.86-4.08)                 |
| Q5 (most deprived)     | 1.55 (1.38-1.74)*   | 27.60 (24.82-30.39)              | 1.13 (0.95-1.35)    | 3.59 (3.01-4.17)                 |

Abbreviations: ADI, area deprivation index; DKA, diabetic ketoacidosis; HHS, hyperglycemic hyperosmolar state; PY, person-years.

**eTable 7.** Estimated Rates of Severe Hypoglycemia and DKA/HHS in Subgroups of Patient Sex

Rates of severe hypoglycemia and DKA/HHS per 1000 person-years, analyses adjusted for patient demographics (age, sex, health plan), percent White residents in the county, comorbidities, and medications (fully adjusted model). \*p <0.05 for the IRR of the quintile examined (Q2-Q5) with ADI Q1 (least deprived) serving as the reference group.

|                     | <b>Hypoglycemia</b> |                                  | <b>DKA/HHS</b>      |                                  |
|---------------------|---------------------|----------------------------------|---------------------|----------------------------------|
|                     | <b>IRR (95% CI)</b> | <b>Rate per 1000 PY (95% CI)</b> | <b>IRR (95% CI)</b> | <b>Rate per 1000 PY (95% CI)</b> |
| <b>Men</b>          |                     |                                  |                     |                                  |
| Q1 (least deprived) | Ref                 | 12.52 (11.88-13.15)              | Ref                 | 7.22 (6.42-8.01)                 |
| Q2                  | 1.00 (0.93-1.08)    | 12.51 (11.64-13.37)              | 0.95 (0.85-1.07)    | 6.87 (6.06-7.68)                 |
| Q3                  | 1.11 (1.01-1.22)*   | 13.89 (12.65-15.12)              | 1.08 (0.96-1.21)    | 7.80 (6.82-8.77)                 |
| Q4                  | 1.11 (1.01-1.23)*   | 13.95 (12.66-15.25)              | 1.05 (0.93-1.20)    | 7.60 (6.66-8.55)                 |
| Q5 (most deprived)  | 1.32 (1.19-1.47)*   | 16.57 (14.98-18.16)              | 1.06 (0.91-1.23)    | 7.63 (6.55-8.72)                 |
| <b>Women</b>        |                     |                                  |                     |                                  |
| Q1 (least deprived) | Ref                 | 14.54 (13.63-15.46)              | Ref                 | 7.75 (7.09-8.42)                 |
| Q2                  | 1.01 (0.92-1.11)    | 14.74 (13.63-15.85)              | 1.09 (0.99-1.20)    | 8.46 (7.71-9.21)                 |
| Q3                  | 1.13 (1.02-1.25)*   | 16.48 (15.03-17.93)              | 1.19 (1.07-1.32)*   | 9.20 (8.27-10.13)                |
| Q4                  | 1.18 (1.06-1.32)*   | 17.21 (15.45-18.96)              | 1.19 (1.06-1.35)*   | 9.25 (8.19-10.31)                |
| Q5 (most deprived)  | 1.48 (1.34-1.63)*   | 21.51 (19.72-23.31)              | 1.17 (1.02-1.35)*   | 9.09 (7.86-10.31)                |

Abbreviations: ADI, area deprivation index; DKA, diabetic ketoacidosis; HHS, hyperglycemic hyperosmolar state; PY, person-years.



**eTable 8.** Estimated Rates of Severe Hypoglycemia and DKA/HHS in Subgroups of Glucose-Lowering Therapy

Rates of severe hypoglycemia and DKA/HHS per 1000 person-years, analyses adjusted for patient demographics (age, sex, health plan), percent White residents in the county, comorbidities, and medications (fully adjusted model). \*p <0.05 for the IRR of the quintile examined (Q2-Q5) with ADI Q1 (least deprived) serving as the reference group.

|                               | Hypoglycemia      |                           | DKA/HHS           |                           |
|-------------------------------|-------------------|---------------------------|-------------------|---------------------------|
|                               | IRR (95% CI)      | Rate per 1000 PY (95% CI) | IRR (95% CI)      | Rate per 1000 PY (95% CI) |
| <b>Bolus ± basal insulin</b>  |                   |                           |                   |                           |
| Q1 (least deprived)           | Ref               | 43.04 (40.79-45.29)       | Ref               | 25.97 (23.87-28.07)       |
| Q2                            | 1.01 (0.94-1.10)  | 43.68 (40.69-46.66)       | 1.11 (0.99-1.24)  | 28.82 (26.02-31.62)       |
| Q3                            | 1.03 (0.95-1.12)  | 44.44 (41.27-47.62)       | 1.25 (1.13-1.39)* | 32.52 (29.84-35.19)       |
| Q4                            | 1.10 (1.00-1.21)  | 47.19 (43.17-51.2)        | 1.16 (0.99-1.35)  | 30.11 (26.01-34.21)       |
| Q5 (most deprived)            | 1.30 (1.18-1.43)* | 55.79 (51.02-60.57)       | 1.16 (0.98-1.38)  | 30.20 (25.64-34.77)       |
| <b>Basal insulin</b>          |                   |                           |                   |                           |
| Q1 (least deprived)           | Ref               | 22.89 (21.26-24.52)       | Ref               | 9.40 (8.17-10.64)         |
| Q2                            | 1.01 (0.91-1.12)  | 23.14 (21.39-24.89)       | 0.93 (0.78-1.13)  | 8.78 (7.35-10.21)         |
| Q3                            | 1.19 (1.06-1.33)* | 27.14 (24.52-29.77)       | 1.04 (0.88-1.24)  | 9.81 (8.28-11.34)         |
| Q4                            | 1.18 (1.04-1.34)* | 26.96 (24.06-29.86)       | 1.19 (0.99-1.42)  | 11.15 (9.43-12.87)        |
| Q5 (most deprived)            | 1.33 (1.18-1.50)* | 30.45 (27.33-33.57)       | 1.16 (0.94-1.44)  | 10.91 (8.76-13.07)        |
| <b>Non-insulin drugs only</b> |                   |                           |                   |                           |
| Q1 (least deprived)           | Ref               | 5.44 (5.11-5.77)          | Ref               | 1.67 (1.51-1.83)          |
| Q2                            | 1.03 (0.93-1.15)  | 5.63 (5.14-6.11)          | 0.99 (0.87-1.14)  | 1.66 (1.49-1.83)          |
| Q3                            | 1.11 (0.99-1.24)  | 6.03 (5.44-6.62)          | 1.07 (0.93-1.23)  | 1.79 (1.61-1.96)          |
| Q4                            | 1.13 (1.00-1.28)  | 6.15 (5.44-6.85)          | 1.07 (0.93-1.25)  | 1.79 (1.58-2.01)          |
| Q5 (most deprived)            | 1.48 (1.32-1.65)* | 8.03 (7.29-8.77)          | 1.01 (0.86-1.20)  | 1.69 (1.47-1.92)          |

Abbreviations: ADI, area deprivation index; DKA, diabetic ketoacidosis; HHS, hyperglycemic hyperosmolar state; PY, person-years.

**eTable 9.** Estimated Rates of Severe Hypoglycemia and DKA/HHS in Subgroups of Patient Health Plans

Rates of severe hypoglycemia and DKA/HHS per 1000 person-years, analyses adjusted for patient demographics (age, sex, health plan), percent White residents in the county, comorbidities, and medications (fully adjusted model). \*p <0.05 for the IRR of the quintile examined (Q2-Q5) with ADI Q1 (least deprived) serving as the reference group.

|                             | Hypoglycemia      |                           | DKA/HHS           |                           |
|-----------------------------|-------------------|---------------------------|-------------------|---------------------------|
|                             | IRR (95% CI)      | Rate per 1000 PY (95% CI) | IRR (95% CI)      | Rate per 1000 PY (95% CI) |
| <b>Commercial insurance</b> |                   |                           |                   |                           |
| Q1 (least deprived)         | Ref               | 6.02 (5.51-6.52)          | Ref               | 8.01 (7.31-8.72)          |
| Q2                          | 0.97 (0.86-1.10)  | 5.85 (5.18-6.53)          | 1.10 (0.98-1.25)  | 8.86 (7.84-9.87)          |
| Q3                          | 0.97 (0.86-1.11)  | 5.87 (5.12-6.61)          | 1.16 (1.05-1.30)* | 9.33 (8.42-10.24)         |
| Q4                          | 0.99 (0.83-1.19)  | 5.98 (4.89-7.06)          | 1.15 (0.96-1.36)  | 9.18 (7.72-10.64)         |
| Q5 (most deprived)          | 1.31 (1.10-1.56)* | 7.89 (6.51-9.26)          | 1.25 (1.05-1.50)* | 10.04 (8.33-11.74)        |
| <b>Medicare Advantage</b>   |                   |                           |                   |                           |
| Q1 (least deprived)         | Ref               | 17.73 (16.8-18.67)        | Ref               | 7.02 (6.30-7.74)          |
| Q2                          | 1.02 (0.94-1.11)  | 18.03 (16.75-19.31)       | 0.96 (0.86-1.07)  | 6.72 (6.00-7.44)          |
| Q3                          | 1.16 (1.05-1.27)* | 20.52 (18.87-22.17)       | 1.12 (1.00-1.24)  | 7.83 (6.95-8.70)          |
| Q4                          | 1.18 (1.07-1.31)* | 20.99 (19.03-22.95)       | 1.11 (0.98-1.26)  | 7.80 (6.86-8.74)          |
| Q5 (most deprived)          | 1.43 (1.30-1.57)* | 25.3 (23.27-27.32)        | 1.07 (0.93-1.22)  | 7.49 (6.53-8.46)          |

Abbreviations: ADI, area deprivation index; DKA, diabetic ketoacidosis; HHS, hyperglycemic hyperosmolar state; PY, person-years.

## **eReference**

1. Ginde AA, Blanc PG, Lieberman RM, Camargo CA, Jr. Validation of ICD-9-CM coding algorithm for improved identification of hypoglycemia visits. *BMC Endocr Disord* 2008;8:4
